# Supplementary figures and images for: Evaluation of an a priori scatter correction algorithm for cone-beam computed tomography based range and dose calculations in proton therapy
Source: PubMed Central journal article supplement — Phys Imaging Radiat Oncol. 2020 Oct 27;16:89–94. doi: 10.1016/j.phro.2020.09.014 (PMC7807858; doi:10.1016/j.phro.2020.09.014), 2020-10-27

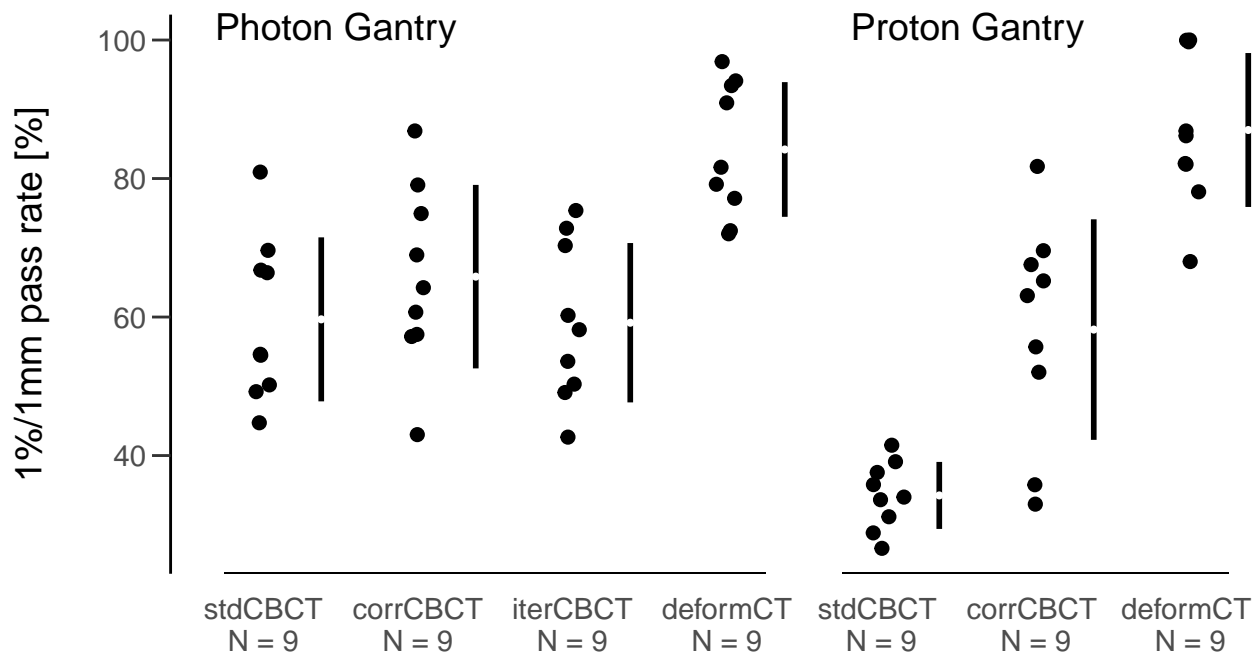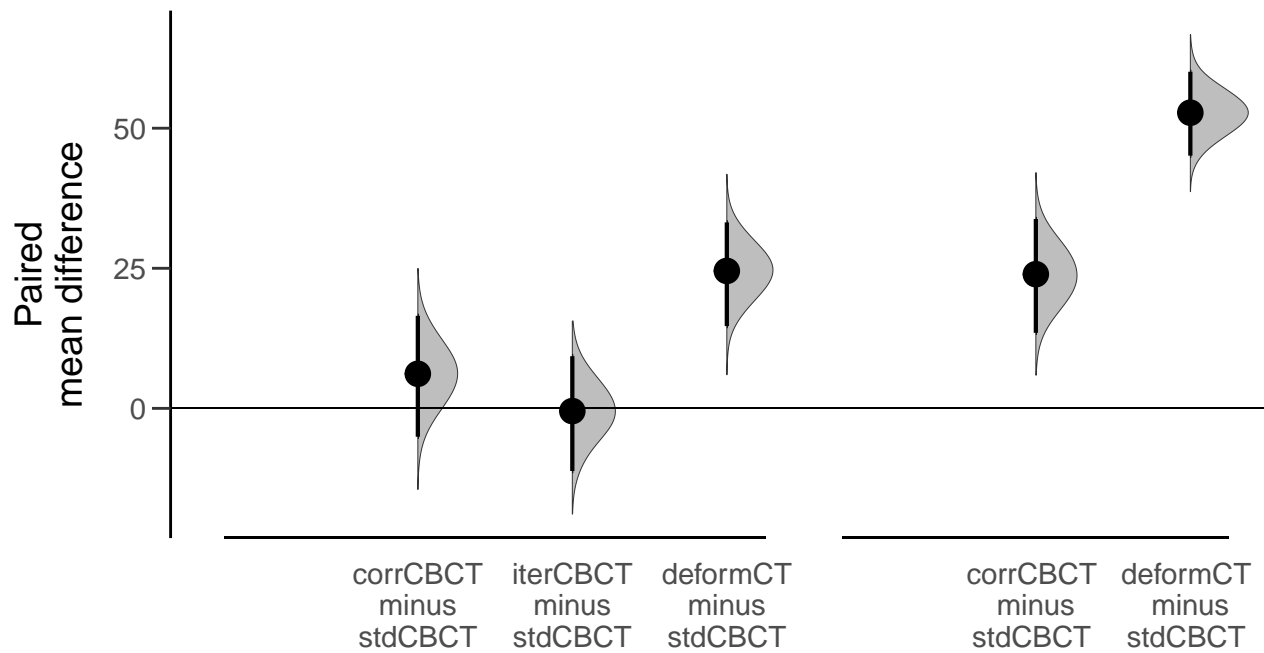

Supplement: mmc2.pdf [file mmc2.pdf]
